# Supplementary material for: Cyclin–CDK Complexes are Key Controllers of Capacitation-Dependent Actin Dynamics in Mammalian Spermatozoa
Source: Int J Mol Sci. 2019 Aug 29;20(17):4236. doi: 10.3390/ijms20174236 (PMC6747110; doi:10.3390/ijms20174236)
Supplement: Supplementary file 1 [file ijms-20-04236-s001.xlsx]

## Sheet: Network Topology
EdgeCount	AverageShortestPathLength	name	ClusteringCoefficient	BetweennessCentrality	ClosenessCentrality	Eccentricity	Indegree	NeighborhoodConnectivity	Outdegree	Stress
36	6.1619	actin dynamics	0.0330688	0.089507	0.162287	9	9	8.5	6	3072
34	2.66667	CDC42	0.0860215	0.10605	0.375	7	29	6.96429	7	5606
30	2.5619	PKA	0.0497836	0.270626	0.390335	5	5	8	5	1665
28	2.8381	SRC	0.1	0.0775537	0.352349	6	5	8.4	1	420
24	3.26667	CDK1	0.37747	0.0220364	0.306122	7	7	8.5	5	3949
23	5.37143	CCNB1	0.389328	0.0101669	0.18617	8	5	12	3	683
22	5.2381	CCNA2	0.404762	0.0132213	0.190909	8	10	10.4615	5	2967
22	5.27619	CDK2	0.378788	0.00889985	0.189531	8	4	12.3333	2	92
22	5.87619	PLK1	0.404762	0.0014515	0.170178	9	10	12.75	2	2700
21	5.33333	PRC1	0.378947	0.00328937	0.1875	9	2	17	0	0
20	5.84762	BUB1	0.457895	0.0006724	0.17101	9	2	18	0	0
20	6.15238	BUB1B	0.457895	8.928e-05	0.162539	9	1	28	0	0
20	6.07619	CCNB2	0.468421	3.069e-05	0.164577	9	5	9	1	348
20	6.02857	MAD2L1	0.457895	0.0006724	0.165877	9	9	4.26667	10	3551
20	5.6381	CDC16	0.468421	4.112e-05	0.177365	9	1	15	0	0
20	5.46667	CDC20	0.457895	0.00615305	0.182927	9	1	9.5	1	493
20	5.25714	CDC23	0.468421	1.422e-05	0.190217	9	1	15	0	0
20	4.57143	PTTG1	0.447368	0.00138872	0.21875	8	1	15	0	0
19	3.35238	AKAP3	0.0380952	0.0529394	0.298295	6	12	8.59091	18	20112
19	5.70476	ANAPC1	0.47076	2.974e-05	0.175292	9	4	10.375	6	1740
19	6.30476	CCNE1	0.473684	2.742e-05	0.15861	9	5	8.66667	0	0
19	5.77143	CKS1B	0.47076	1.671e-05	0.173267	9	2	8.66667	2	225
19	4.00943	ANAPC10	0.47076	0	0.249412	8	4	7.71429	3	854
19	5.53333	BUB3	0.459064	0.00434682	0.180723	9	0	13	1	0
19	3.45714	cAMP	0.0285714	0.0540916	0.289256	6	6	9.84615	7	1596
18	4.74286	NEK2	0.444444	0.00265688	0.210843	8	8	20.0526	11	7
15	4.57143	[Ca2+]i	0.0757576	0.0334707	0.21875	7	12	20.8	8	160
15	5.69524	ACTA1	0.134615	0.0603766	0.175585	8	16	20.8	4	26
15	5.40952	CDKN1B	0.395238	0.00604938	0.184859	8	17	19.7273	5	1920
15	4.44762	MAPK1	0.142857	0.12011	0.224839	7	21	20.1739	2	1847
13	3.95238	RhoA	0.0641026	0.024861	0.253012	7	14	20	6	8
12	5.95238	PLC?	0.107143	0.0428405	0.168	9	17	20.1579	2	6
12	5.37143	PAK1	0.227273	0.0567518	0.18617	8	18	19.5	4	1721
11	3.33333	Arp2/3	0.0454546	0.0276295	0.3	5	14	20.2667	1	1184
11	3.41905	p-Tyr	0.0727273	0.0251845	0.292479	5	9	20.1053	10	5
11	3.37143	CAV1	0.2	0.0114348	0.29661	7	14	20.8	6	160
10	4.61905	EGFR	0.0714286	0.0188132	0.216495	7	13	20.0455	9	203
10	3.84762	PKC	0.0714286	0.0311042	0.259901	6	0	20.0526	19	0
10	3.19643	ROS	0.0777778	0.0063716	0.312849	5	7	20.9474	12	631
10	3.4381	PP2A	0.133333	0.0415132	0.290859	6	8	20	12	9
9	6.94286	PLD	0.0714286	0.0238935	0.144033	10	6	20.8	14	780
9	3.49524	LIMK	0.0416667	0.113104	0.286104	8	2	20	18	1
8	4.4381	sAC	0.15	0.013094	0.225322	7	3	19.6087	21	1585
8	3.16981	CFL1	0.339286	0	0.315476	7	7	20.0556	11	632
8	5.28571	PIP2 cleavage	0	0.0449049	0.189189	8	4	20	16	394
7	3.42857	AKAP4	0.214286	0.00819409	0.291667	6	3	9.25	1	325
7	0	RhoA GTPase	0.119048	0	0	0	7	10.625	2	1296
7	3.72381	WAS	0.380952	0.00011141	0.268542	7	7	7.90909	4	1393
7	3.31481	H2O2	0.166667	0.00034845	0.301676	5	9	9.27273	2	1369
7	6.94286	PIP3	0	0.00510344	0.144033	10	0	8.66667	3	0
7	6.15238	PIP2	0	0.0128825	0.162539	9	2	16	3	96
6	8.09524	Gelsolin	0	0.00556567	0.123529	11	5	14.5	1	12
6	6.25714	LIMK1	0.4	0.00199113	0.159817	9	0	15	1	0
6	7.09524	ADF/cofilin	0.0666667	0.00666363	0.14094	10	0	4	1	0
6	5.40952	RAF1	0.2	0.00018347	0.184859	8	0	11.6667	3	0
6	1.25	CAMKII	0.05	0.015929	0.8	2	14	14.1333	1	11415
6	4.2	Wasp	0.0333333	0.0190914	0.238095	6	7	8.71429	0	0
6	3.47619	PDE	0.166667	0.123503	0.287671	6	0	12	1	0
6	3.93396	EGF	0.3	0	0.254197	6	0	7	4	0
6	4.23585	proAKAP4	0	0.00603027	0.23608	7	0	15	1	0
5	0	ROPN1	0.5	0	0	0	13	4.26667	6	3338
5	3.74286	CTNND1	0.3	0.00136989	0.267176	7	2	5.25	2	426
5	5.99048	PI3K	0	0.00357131	0.166932	9	3	6.2	3	1392
5	4.28037	HCO3-	0	0.00608715	0.233624	6	1	5	0	0
5	5.50476	IP3	0	0.014521	0.181661	8	1	5	0	0
4	4.32381	ROPN1L	0.5	0.00378314	0.231278	7	1	3	1	349
4	7.89524	ARF	0.0833333	0.00511055	0.126659	11	1	15	0	0
4	4.28302	CABYR	0.5	0	0.23348	7	1	15	0	0
4	4.37143	PDE 1	0.0833333	0.00714008	0.228758	7	0	28	1	0
4	0	RhoAA	0.0833333	0	0	0	1	17	1	0
4	3.73333	PTK2B	0.333333	0	0.267857	7	5	13.5	6	581
4	4.30476	TK	0.166667	0.00305096	0.232301	6	5	11.7419	29	7457
4	4.18095	PI3K	0.333333	0.00596603	0.23918	6	1	6	0	0
3	3.90566	BRAP	0	0	0.256039	7	1	6	0	0
3	4.48113	C3 exoenzyme	0.166667	0	0.223158	7	5	18.3	16	766
3	0	SSH1	0.5	0	0	0	1	3	1	7
3	4.80952	DAG	0	0.0264696	0.207921	7	4	8.75	0	0
3	7.13333	Gelsolin-PIP2	0	0.00694049	0.140187	10	2	17.5	0	0
3	7.10377	tyrosine phosphatase	0.166667	0.00020622	0.14077	10	1	15.25	3	0
3	0	NO	0	0	0	0	1	31	0	0
3	7.87736	LPAR-LPA	0	0.00352003	0.126946	11	8	11.9048	20	5435
3	6.40952	PA	0.333333	0.0029298	0.156018	9	3	15	0	0
3	7.26667	PC	0	0.00787917	0.137615	10	2	31	0	0
3	4.22642	PDK1	0	0	0.236607	6	1	31	0	0
3	6.23585	PI4P	0	0.0120605	0.160363	9	3	13.5714	4	7
3	4.39048	Proteasome	0.333333	0.00243676	0.227766	7	3	9.66667	3	1504
2	0	VIL1	0.5	0	0	0	0	13.5	8	0
2	0	AR	1	0	0	0	0	9.5	2	0
2	5.33333	CALM	0	0.00805031	0.1875	8	4	13.5	2	11672
2	1	SSH1L	0	0.0040107	1	1	0	11.5	2	0
2	5.53333	CatSper	0.5	0	0.180723	8	0	13	1	0
2	1	CDC25	0	0.000128	1	1	0	13	1	0
2	0	ARHGAP10	0.5	0	0	0	1	8	2	1302
2	0	VAMP	0	0	0	0	0	17	2	0
2	4.40566	CGS 21680	0.5	0	0.226981	7	0	11.6	6	0
2	4.04717	CK-636	0	0	0.247086	6	2	7.75	2	145
2	7.03774	destrin	0.5	0	0.142091	10	3	11	2	201
2	1.5	PTK2	0	0.00408181	0.666667	2	1	4.5	1	369
2	5.19626	ERK2	0	0	0.192446	8	0	5	2	0
2	1	RhoAGDI1	0	2.844e-05	1	1	3	6.2	3	594
2	4.90566	GEFs	0.5	0	0.203846	8	0	2	1	0
2	4.32075	GNA13	0	0.00251024	0.231441	7	1	2.5	1	1
2	4.42453	tmAC	0	0.00301513	0.226013	7	0	15	1	0
2	4.30189	Kinases	0.5	0	0.232456	7	0	8	1	0
2	1	RAC1	0.5	0	1	1	0	13	1	0
2	5.05556	LPA	0	0	0.197802	7	0	10	2	0
2	1	MAPK	0	0.00225029	1	1	2	13.6667	1	360
2	0	PLD	0	0	0	0	0	11	1	0
2	4.34906	MMPX	0.5	0	0.229935	7	1	8.5	1	141
2	5.24074	Na+/HCO3-	0	0.00307202	0.190813	7	0	2	1	0
2	6.23364	p27	0	0	0.16042	10	1	8	1	163
2	4.46667	PAK	0	0.0058592	0.223881	9	1	11.4286	6	21
2	0	cGMP	0	0	0	0	1	7	0	0
2	4.37736	PDE4	0	0	0.228448	7	2	12.3333	1	18
2	7.17757	PI phosphorilate	0	0.00608715	0.139323	10	1	4.75	4	284
2	8.11111	PI4K	0	0.00307202	0.123288	11	1	4	0	0
2	0	PKCa	0	0	0	0	0	3	1	0
2	5.15741	PMA	0	0	0.193896	8	3	4	0	0
2	4.22642	PP2-B55	0.5	0	0.236607	8	2	6.5	3	1316
2	6.93396	Py2K	0	0	0.144218	10	1	4	0	0
2	4.46226	ROCK	0	0.00301513	0.224101	9	0	11	1	0
2	4.35514	sodium vanadate	0	0	0.229614	6	0	11	2	0
1	0	PM and OAM fusion	0	0	0	0	0	28	1	0
1	0	CABYR	0	0	0	0	3	8.55556	6	7697
1	0	CaN	0	0	0	0	1	9	0	0
1	0	PDE4	0	0	0	0	1	8	1	0
1	4.91509	ALDH7A1	0	0	0.203455	8	0	2.5	2	0
1	4.32075	BRAP2	0	0	0.231441	7	2	3.66667	1	157
1	8.82075	Brefeldin	0	0	0.113369	12	0	3	1	0
1	5.5283	Ca2+ channel	0	0	0.180887	8	1	12	1	145
1	4.42453	Calcitonin	0	0	0.226013	7	2	5	0	0
1	0	Py2K	0	0	0	0	0	10	1	0
1	0	Pyk2	0	0	0	0	2	8.4	8	338
1	0	cNGCC	0	0	0	0	0	9.5	2	0
1	0	Epac	0	0	0	0	1	2.5	1	143
1	7.10377	capping protein ß3	0	0	0.14077	10	0	10.5	2	0
1	0	eNOS	0	0	0	0	1	2	0	0
1	0	G protein	0	0	0	0	0	15	1	0
1	0	RASIP1	0	0	0	0	1	14.6667	2	146
1	0	VAPA	0	0	0	0	1	11	1	399
1	6.64151	cofilin I	0	0	0.150568	9	1	4	2	494
1	6.64151	cofilin II	0	0	0.150568	9	1	3	0	0
1	1.5	ezrin	0	0	0.666667	2	2	3	0	0
1	4.42453	FPP	0	0	0.226013	7	0	8.5	2	0
1	6.89623	Galpha	0	0	0.145007	10	0	13	3	0
1	4.91509	GDI	0	0	0.203455	8	5	8.66667	2	391
1	4.38679	Genestein	0	0	0.227957	6	0	6	1	0
1	5.38318	GPCRs	0	0	0.185764	8	1	2.5	1	310
1	0	capacitation	0	0	0	0	2	3.66667	1	616
1	0	pHi	0	0	0	0	3	4	5	3027
1	1	insulin	0	0	1	1	2	12.25	2	439
1	0	Ca2+ channel opening	0	0	0	0	1	1.5	1	156
1	4.30189	JMY	0	0	0.232456	6	0	3	1	0
1	7.10377	latrunculins	0	0	0.14077	10	2	4.8	5	1403
1	0	Cofilin	0	0	0	0	1	5	0	0
1	8.80374	LPAR	0	0	0.113588	12	1	22	0	0
1	4.16814	mitochondria	0	0	0.239915	6	5	10.5	5	2661
1	0	CDK/cyclins	0	0	0	0	1	10	2	159
1	4.42453	P4	0	0	0.226013	7	2	5.5	0	0
1	0	choline	0	0	0	0	0	3	2	0
1	8.0283	phosphatase slingshot	0	0	0.124559	11	1	2	0	0
1	7.17757	PI4P5K	0	0	0.139323	10	0	21.5	2	0
1	0	IP2	0	0	0	0	0	10	1	0
1	0	Dynein (motility)	0	0	0	0	0	28	1	0
1	0	ERK1/2	0	0	0	0	0	15	1	0
1	4.16814	PRDXs	0	0	0.239915	6	0	4	2	0
1	7.10377	protein phosphatase 1d activity	0	0	0.14077	10	0	6	1	0
1	5.40566	PRRT2	0	0	0.184991	8	0	2	1	0
1	5.16038	RhoB	0	0	0.193784	7	1	5	1	208
1	5.42056	RhoA-GTP	0	0	0.184483	10	0	7	1	0
1	1	RhoAphilin	0	0	1	1	1	10	0	0
1	0	ERK	0	0	0	0	1	10	0	0
1	0	PI3K/Akt	0	0	0	0	0	11	1	0
1	4.30189	Scar/WAVE	0	0	0.232456	6	0	28	1	0
1	7.10377	scinderin	0	0	0.14077	10	0	31	1	0
1	3.64151	secramine A	0	0	0.274611	8	0	7	2	0
1	6.19266	sperm plasma membrane	0	0	0.161481	8	0	2	1	0
1	9.0367	Spermine	0	0	0.11066	12	0	2	1	0
1	0	cofilin	0	0	0	0	1	2	0	0
1	8.0283	testicular protein kinase	0	0	0.124559	11	0	6	1	0
1	7.10377	testis-specific actin capping protein	0	0	0.14077	10	0	28	1	0
1	7.10377	thymosin ß10	0	0	0.14077	10	0	28	1	0
1	1	TNFa	0	0	1	1	0	3	1	0
1	9.01887	tyrosine dephosphorylation	0	0	0.110879	12	0	5	1	0
1	4.30189	WASH	0	0	0.232456	6	0	11	1	0
1	0	Cofilin I	0	0	0	0	1	6	0	0
1	0	Cofilin II	0	0	0	0	1	6	0	0
1	4.30189	WASP family	0	0	0.232456	6	0	11	1	0
1	4.30189	WHAMM	0	0	0.232456	6	0	11	1	0

## Sheet: Hubs
		name	EdgeCount	ClusteringCoefficient
		CCNE1	19	0.473684
		ANAPC1	19	0.47076			-0.27123
		CKS1B	19	0.47076
		ANAPC10	19	0.47076
		CCNB2	20	0.468421
		CDC16	20	0.468421
		CDC23	20	0.468421
		BUB3	19	0.459064
		BUB1	20	0.457895
		BUB1B	20	0.457895
		MAD2L1	20	0.457895
		CDC20	20	0.457895
		PTTG1	20	0.447368
		NEK2	18	0.444444
		CCNA2	22	0.404762
		PLK1	22	0.404762
		CDKN1B	15	0.395238
		CCNB1	23	0.389328
		PRC1	21	0.378947
		CDK2	22	0.378788
		CDK1	24	0.37747
		MAPK1	15	0.142857
		ACTA1	15	0.134615
		SRC	28	0.1
		CDC42	34	0.0860215
		[Ca2+]i	15	0.0757576
		RhoA	13	0.0641026
		PKA	30	0.0497836
		AKAP3	19	0.0380952
		actin dynamics	36	0.0330688
		cAMP	19	0.0285714

## Sheet: DB Network
Molecule A	Kind of interaction	Target Molecule
Ca2+ channel	activates	[Ca2+]i
CatSper	activates	[Ca2+]i
CK-636	decrease	[Ca2+]i
EGFR	activates	[Ca2+]i
PKA	activates	[Ca2+]i
PKC	activates	[Ca2+]i
ROS	increases	[Ca2+]i
Arp2/3	polymerize	ACTA1
cofilin I	polymerize	ACTA1
cofilin II	polymerize	ACTA1
[Ca2+]i	activates	actin dynamics
actin dynamics	activates	actin dynamics
actin dynamics	induces	actin dynamics
ADF/cofilin	produce	actin dynamics
Arp2/3	activates	actin dynamics
capping protein β3	binds	actin dynamics
CDC42	regulates	actin dynamics
destrin	stimulates	actin dynamics
EGF	stimulates	actin dynamics
ACTA1	activates	actin dynamics
ACTA1	activates	actin dynamics
Gelsolin-PIP2	activates	actin dynamics
H2O2	stimulates	actin dynamics
latrunculins	inhibit	actin dynamics
PA	activates	actin dynamics
PI3K	activates	actin dynamics
PIP3	regulated	actin dynamics
PKA	actives	actin dynamics
PKC	involved	actin dynamics
PLCγ	releases	actin dynamics
PLD	activates	actin dynamics
protein phosphatase 1δ activity	produce	actin dynamics
p-Tyr	stimulates	actin dynamics
RhoA	regulates	actin dynamics
ROS	inhibites	actin dynamics
scinderin	binds	actin dynamics
testis-specific actin capping protein	binds	actin dynamics
thymosin β10	stimulates	actin dynamics
tyrosine phosphatase	inhibitis	actin dynamics
destrin	membro	ADF/cofilin
LIMK	phosphorylate	ADF/cofilin
phosphatase slingshot	dephosphorylates	ADF/cofilin
Rho GTPase	phosphorylate	ADF/cofilin
testicular protein kinase	phosphorylate	ADF/cofilin
BRAP2	binds	AKAP3
GNA13	binds	AKAP3
Kinases	phosphorylates	AKAP3
PI3K	blocks	AKAP3
PKA	actives	AKAP3
Kinases	phosphorylates	AKAP4
proAKAP4	forms	AKAP4
actin dynamics	activates	AR
PLCγ	involved	AR
Brefeldin	inhibition	ARF
PIP3	recruiting	ARF
PKA	phosphorylates	ARF
Wasp	interacts	Arp2/3
CK-636	inhibitis	Arp2/3
JMY	actives	Arp2/3
Scar/WAVE	actives	Arp2/3
WASH	actives	Arp2/3
WASP family	actives	Arp2/3
WHAMM	actives	Arp2/3
IP3	increases	[Ca2+]i
IP3	increases	[Ca2+]i
IP3	activates	Ca2+ channel opening
AKAP3	binds	CABYR
AKAP3	bind	CALM
PP2A	activates	CAMKII
PP2A	activates	CAMKII
SRC	activates	CAMKII
Calcitonin	increases	cAMP
CGS 21680	increases	cAMP
FPP	increases	cAMP
MMPX	increases	cAMP
P4	increases	cAMP
PDE	degradates	cAMP
PDE 1	hydrolyzes	cAMP
PDE 4	hydrolyzes	cAMP
proAKAP4	inhibits	cAMP
sAC	activates	cAMP
sAC	synthetizes	cAMP
sAC	generates	cAMP
tmAC	activates	cAMP
AKAP3	bind	CaN
H2O2	inhibits	capacitation
PKA	modulates	CatSper
SRC	phosphorylates	CAV1
SRC	phosphorylates	CAV1
SRC	inhibits	CAV1
PTK2	actives	CDC25
CAV1	regolates	CDC42
CAV1	inhibits	CDC42
LIMK	activates	CDC42
secramine A	inhibits	CDC42
p27	inhibits	CDK/cyclins
PP2-B55	dephosphorylates	Cdk1
PDE 1	hydrolyzes	cGMP
PDE 4	hydrolyzes	cGMP
PC	produce	choline
cAMP	actives	cNGCC
LIMK	phosphorylates	Cofilin
SSH1L	dephosphorylates	cofilin
Wasp	interacts	Cofilin I
Wasp	interacts	Cofilin II
PIP2 cleavage	form	DAG
PKA	activates	Dynein (motility)
[Ca2+]i	activates	EGFR
EGF	activates	EGFR
EGF	actives	EGFR
SRC	activates	EGFR
SRC	phosphorylate	EGFR
CAV1	interacts	eNOS
cAMP	actives	Epac
ROS	phospharylates	ERK
PMA	activates	ERK1/2
CAV1	interacts	G protein
actin dynamics	activates	ACTA1
PA	severs	ACTA1
[Ca2+]i	activates	Gelsolin
SRC	phosphorylate	Gelsolin
tyrosine dephosphorylation	activates	Gelsolin
PIP2	binds	Gelsolin
SRC	inactivates	Gelsolin
Gelsolin	form	Gelsolin-PIP2
PIP2 cleavage	form	Gelsolin-PIP2
LPA	activates	GNA13
ROS	produce	H2O2
Na+/HCO3-	trasport	HCO3-
PIP2	produces	IP2
PIP2	produces	IP3
PIP2 cleavage	form	IP3
PAK	stimulates	LIMK
PKA	phosphorylates	LIMK
ROCK	phosphorylates	LIMK
LPA	form	LPAR-LPA
LPAR	form	LPAR-LPA
PKA	phosphorylates	MAPK
sperm plasma membrane	present	Na+/HCO3-
insulin	increase	NO
ROS	produce	NO
TNFα	increase	NO
PC	produce	PA
RHO	activates	PAK
PLD	hydrolyses	PC
CGS 21680	reduces	PDE
MAPK1	phosphorylates	PDE
PKA	phosphorylates	PDE
PKA	activates	PDE
calmodulin	activates	PDE 1
MMPX	inhibites	PDE 1
AKAP3	bind	PDE4
HCO3-	increase	pHi
PI4K	phosphorylate	PI phosphorilate
EGFR	activates	PI3K
Py2k	phosphorylates	PI3K
Pyk2	phosphorylates	PI3K
PKA	activates	PI3K
PP1γ2	inhibition	PI3K
ROS	phosphorylates	PI3K/Akt
Spermine	activates	PI4K
PI phosphorilate	form	PI4P
PI4P5K	phosphorylate	PI4P
PLCγ	catalyzes	PIP2
PLCγ	hydrolyzes	PIP2
PI3K	phosphorylates	PIP2 cleavage
PI4P	form	PIP2 cleavage
PLCγ	hydrolyses	PIP2 cleavage
PDK1	binds	PIP3
PI3K	production	PIP3
PIP2	produces	PIP3
PIP2	produces	PIP3
PIP2 cleavage	form	PIP3
AKAP3	bind	PKA
AKAP4	binds	PKA
Arp2/3	regulates	PKA
cAMP	activates	PKA
cAMP	binds	PKA
cAMP	activates	PKA
H2O2	actives	PKA
PDE	activates	PKA
PP2A	blocks	PKA
p-Tyr	stimulates	PKA
ROS	phosphorylates	PKA
PP2A	activates	PKA
AKAP3	bind	PKC
DAG	activates	PKC
DAG	activates	PKC
ROS	phosphorylates	PKC
PKC	isoform	PKCα
Proteasome	degrades	PKCα
[Ca2+]i	activates	PLCγ
EGF	activates	PLCγ
Galpha	stimulates	PLCγ
[Ca2+]i	activates	PLCγ
actin dynamics	immobilized	PLCγ
actin dynamics	immobilized	PLCγ
EGFR	activates	PLCγ
ARF	activates	PLD
LPAR-LPA	activates	PLD
PKA	activates	PLD
PKC	activates	PLD
PKC	activates	PLD
Rho GTPase	regulated	PLD
TK	activates	PLD
MAPK	activates	PLD
PIP2 cleavage	activates	PLD
actin dynamics	activates	PM and OAM fusion
PKA	inhibition	PP1γ2
PKC	activates	PP1γ2
Proteasome	degrades	PP1γ2
SRC	inactivates	PP2A
SRC	inhibits	PP2A
CDK1	phosphorylates	PRC1
p27	blocks	PRC1
PP2-B55	activates	PRC1
ERK2	phosphorylates	proAKAP4
ERK2	phosphorylates	proAKAP4
PMA	moves	proAKAP4
PKA	activates	Proteasome
PDK1	inhibits	p-Tyr
EGFR	actives	PTK2
Arp2/4	regulates	p-Tyr
cAMP	stimulates	p-Tyr
EGF	stimulates	p-Tyr
Genestein	blocked	p-Tyr
H2O2	activates	p-Tyr
HCO3-	activates	p-Tyr
sodium vanadate	stimulates	p-Tyr
TK	stimulates	p-Tyr
CAMKII	phosphorylates	Py2K
CAMKII	activates	Pyk2
LIMK	activates	RAC1
proAKAP4	interacts	Raf-1
C3 exoenzyme	inactivates	RHO
GDI	inhibits	RHO
GEFs	phosphorylates	RHO
CDC25	actives	RhoA
LIMK	activates	RhoA
PKA	phosphorylates	RhoA
C3 exoenzyme	inhibition	Rho GTPase
CDC42	member	Rho GTPase
GEFs	regulate	Rho GTPase
LIMK	dependent	Rho GTPase
RAC1	member	Rho GTPase
RhoA	member	Rho GTPase
Rhophilin	binds	Rho GTPase
RhoGDI1	binds	RhoA
ezrin	interacts	RhoGDI1
RHO-GTP	phophorylates	ROCK
AKAP3	binds	ROPN1
AKAP3	binds	ROPN1
AKAP3	binds	ROPN1L
mitochondria	produce	ROS
PRDXs	regulates	ROS
[Ca2+]i	activates	sAC
H2O2	activates	sAC
HCO3-	activates	sAC
HCO3-	activates	sAC
PKA	inhibites	sAC
H2O2	inhibits	spem motility
PKA	phosphorylates	SRC
PKA	activates	SRC
CAMKII	inhibits	SSH1L
EGF	binds	TK
EGFR	member	TK
GPCRs	activates	tmAC
H2O2	inhibits	tyrosine phosphatase
sodium vanadate	inhibitis	tyrosine phosphatase
CDC42	activates	VAMP
CDC42	activates	VAMP
CDC42	activates	Wasp
RHOA	binds	Wasp
RHOB	activates	Wasp

## Sheet: STRING Network
Molecule A	Kind of interaction	Target Molecule
Ca2+ channel	activates	[Ca2+]i
CatSper	activates	[Ca2+]i
CK-636	decrease	[Ca2+]i
EGFR	activates	[Ca2+]i
PKA	activates	[Ca2+]i
PKC	activates	[Ca2+]i
ROS	increases	[Ca2+]i
Arp2/3	polymerize	ACTA1
cofilin I	polymerize	ACTA1
cofilin II	polymerize	ACTA1
[Ca2+]i	activates	actin dynamics
actin dynamics	activates	actin dynamics
actin dynamics	induces	actin dynamics
ADF/cofilin	produce	actin dynamics
Arp2/3	activates	actin dynamics
capping protein β3	binds	actin dynamics
CDC42	regulates	actin dynamics
destrin	stimulates	actin dynamics
EGF	stimulates	actin dynamics
ACTA1	activates	actin dynamics
ACTA1	activates	actin dynamics
Gelsolin-PIP2	activates	actin dynamics
H2O2	stimulates	actin dynamics
latrunculins	inhibit	actin dynamics
PA	activates	actin dynamics
PI3K	activates	actin dynamics
PIP3	regulated	actin dynamics
PKA	actives	actin dynamics
PKC	involved	actin dynamics
PLCγ	releases	actin dynamics
PLD	activates	actin dynamics
protein phosphatase 1δ activity	produce	actin dynamics
p-Tyr	stimulates	actin dynamics
RhoA	regulates	actin dynamics
ROS	inhibites	actin dynamics
scinderin	binds	actin dynamics
testis-specific actin capping protein	binds	actin dynamics
thymosin β10	stimulates	actin dynamics
tyrosine phosphatase	inhibitis	actin dynamics
destrin	membro	ADF/cofilin
LIMK	phosphorylate	ADF/cofilin
phosphatase slingshot	dephosphorylates	ADF/cofilin
Rho GTPase	phosphorylate	ADF/cofilin
testicular protein kinase	phosphorylate	ADF/cofilin
BRAP2	binds	AKAP3
GNA13	binds	AKAP3
Kinases	phosphorylates	AKAP3
PI3K	blocks	AKAP3
PKA	actives	AKAP3
Kinases	phosphorylates	AKAP4
proAKAP4	forms	AKAP4
actin dynamics	activates	AR
PLCγ	involved	AR
Brefeldin	inhibition	ARF
PIP3	recruiting	ARF
PKA	phosphorylates	ARF
Wasp	interacts	Arp2/3
CK-636	inhibitis	Arp2/3
JMY	actives	Arp2/3
Scar/WAVE	actives	Arp2/3
WASH	actives	Arp2/3
WASP family	actives	Arp2/3
WHAMM	actives	Arp2/3
IP3	increases	[Ca2+]i
IP3	increases	[Ca2+]i
IP3	activates	Ca2+ channel opening
AKAP3	binds	CABYR
AKAP3	bind	CALM
PP2A	activates	CAMKII
PP2A	activates	CAMKII
SRC	activates	CAMKII
Calcitonin	increases	cAMP
CGS 21680	increases	cAMP
FPP	increases	cAMP
MMPX	increases	cAMP
P4	increases	cAMP
PDE	degradates	cAMP
PDE 1	hydrolyzes	cAMP
PDE 4	hydrolyzes	cAMP
proAKAP4	inhibits	cAMP
sAC	activates	cAMP
sAC	synthetizes	cAMP
sAC	generates	cAMP
tmAC	activates	cAMP
AKAP3	bind	CaN
H2O2	inhibits	capacitation
PKA	modulates	CatSper
SRC	phosphorylates	CAV1
SRC	phosphorylates	CAV1
SRC	inhibits	CAV1
PTK2	actives	CDC25
CAV1	regolates	CDC42
CAV1	inhibits	CDC42
LIMK	activates	CDC42
secramine A	inhibits	CDC42
p27	inhibits	CDK/cyclins
PP2-B55	dephosphorylates	Cdk1
PDE 1	hydrolyzes	cGMP
PDE 4	hydrolyzes	cGMP
PC	produce	choline
cAMP	actives	cNGCC
LIMK	phosphorylates	Cofilin
SSH1L	dephosphorylates	cofilin
Wasp	interacts	Cofilin I
Wasp	interacts	Cofilin II
PIP2 cleavage	form	DAG
PKA	activates	Dynein (motility)
[Ca2+]i	activates	EGFR
EGF	activates	EGFR
EGF	actives	EGFR
SRC	activates	EGFR
SRC	phosphorylate	EGFR
CAV1	interacts	eNOS
cAMP	actives	Epac
ROS	phospharylates	ERK
PMA	activates	ERK1/2
CAV1	interacts	G protein
actin dynamics	activates	ACTA1
PA	severs	ACTA1
[Ca2+]i	activates	Gelsolin
SRC	phosphorylate	Gelsolin
tyrosine dephosphorylation	activates	Gelsolin
PIP2	binds	Gelsolin
SRC	inactivates	Gelsolin
Gelsolin	form	Gelsolin-PIP2
PIP2 cleavage	form	Gelsolin-PIP2
LPA	activates	GNA13
ROS	produce	H2O2
Na+/HCO3-	trasport	HCO3-
PIP2	produces	IP2
PIP2	produces	IP3
PIP2 cleavage	form	IP3
PAK	stimulates	LIMK
PKA	phosphorylates	LIMK
ROCK	phosphorylates	LIMK
LPA	form	LPAR-LPA
LPAR	form	LPAR-LPA
PKA	phosphorylates	MAPK
sperm plasma membrane	present	Na+/HCO3-
insulin	increase	NO
ROS	produce	NO
TNFα	increase	NO
PC	produce	PA
RHO	activates	PAK
PLD	hydrolyses	PC
CGS 21680	reduces	PDE
MAPK1	phosphorylates	PDE
PKA	phosphorylates	PDE
PKA	activates	PDE
calmodulin	activates	PDE 1
MMPX	inhibites	PDE 1
AKAP3	bind	PDE4
HCO3-	increase	pHi
PI4K	phosphorylate	PI phosphorilate
EGFR	activates	PI3K
Py2k	phosphorylates	PI3K
Pyk2	phosphorylates	PI3K
PKA	activates	PI3K
PP1γ2	inhibition	PI3K
ROS	phosphorylates	PI3K/Akt
Spermine	activates	PI4K
PI phosphorilate	form	PI4P
PI4P5K	phosphorylate	PI4P
PLCγ	catalyzes	PIP2
PLCγ	hydrolyzes	PIP2
PI3K	phosphorylates	PIP2 cleavage
PI4P	form	PIP2 cleavage
PLCγ	hydrolyses	PIP2 cleavage
PDK1	binds	PIP3
PI3K	production	PIP3
PIP2	produces	PIP3
PIP2	produces	PIP3
PIP2 cleavage	form	PIP3
AKAP3	bind	PKA
AKAP4	binds	PKA
Arp2/3	regulates	PKA
cAMP	activates	PKA
cAMP	binds	PKA
cAMP	activates	PKA
H2O2	actives	PKA
PDE	activates	PKA
PP2A	blocks	PKA
p-Tyr	stimulates	PKA
ROS	phosphorylates	PKA
PP2A	activates	PKA
AKAP3	bind	PKC
DAG	activates	PKC
DAG	activates	PKC
ROS	phosphorylates	PKC
PKC	isoform	PKCα
Proteasome	degrades	PKCα
[Ca2+]i	activates	PLCγ
EGF	activates	PLCγ
Galpha	stimulates	PLCγ
[Ca2+]i	activates	PLCγ
actin dynamics	immobilized	PLCγ
actin dynamics	immobilized	PLCγ
EGFR	activates	PLCγ
ARF	activates	PLD
LPAR-LPA	activates	PLD
PKA	activates	PLD
PKC	activates	PLD
PKC	activates	PLD
Rho GTPase	regulated	PLD
TK	activates	PLD
MAPK	activates	PLD
PIP2 cleavage	activates	PLD
actin dynamics	activates	PM and OAM fusion
PKA	inhibition	PP1γ2
PKC	activates	PP1γ2
Proteasome	degrades	PP1γ2
SRC	inactivates	PP2A
SRC	inhibits	PP2A
CDK1	phosphorylates	PRC1
p27	blocks	PRC1
PP2-B55	activates	PRC1
ERK2	phosphorylates	proAKAP4
ERK2	phosphorylates	proAKAP4
PMA	moves	proAKAP4
PKA	activates	Proteasome
PDK1	inhibits	p-Tyr
EGFR	actives	PTK2
Arp2/4	regulates	p-Tyr
cAMP	stimulates	p-Tyr
EGF	stimulates	p-Tyr
Genestein	blocked	p-Tyr
H2O2	activates	p-Tyr
HCO3-	activates	p-Tyr
sodium vanadate	stimulates	p-Tyr
TK	stimulates	p-Tyr
CAMKII	phosphorylates	Py2K
CAMKII	activates	Pyk2
LIMK	activates	RAC1
proAKAP4	interacts	Raf-1
C3 exoenzyme	inactivates	RHO
GDI	inhibits	RHO
GEFs	phosphorylates	RHO
CDC25	actives	RhoA
LIMK	activates	RhoA
PKA	phosphorylates	RhoA
C3 exoenzyme	inhibition	Rho GTPase
CDC42	member	Rho GTPase
GEFs	regulate	Rho GTPase
LIMK	dependent	Rho GTPase
RAC1	member	Rho GTPase
RhoA	member	Rho GTPase
Rhophilin	binds	Rho GTPase
RhoGDI1	binds	RhoA
ezrin	interacts	RhoGDI1
RHO-GTP	phophorylates	ROCK
AKAP3	binds	ROPN1
AKAP3	binds	ROPN1
AKAP3	binds	ROPN1L
mitochondria	produce	ROS
PRDXs	regulates	ROS
[Ca2+]i	activates	sAC
H2O2	activates	sAC
HCO3-	activates	sAC
HCO3-	activates	sAC
PKA	inhibites	sAC
H2O2	inhibits	spem motility
PKA	phosphorylates	SRC
PKA	activates	SRC
CAMKII	inhibits	SSH1L
EGF	binds	TK
EGFR	member	TK
GPCRs	activates	tmAC
H2O2	inhibits	tyrosine phosphatase
sodium vanadate	inhibitis	tyrosine phosphatase
CDC42	activates	VAMP
CDC42	activates	VAMP
CDC42	activates	Wasp
RHOA	binds	Wasp
RHOB	activates	Wasp

## Sheet: Merged Network
Molecule A	Kind of interaction	Target Molecule
Ca2+ channel	activates	[Ca2+]i
CatSper	activates	[Ca2+]i
CK-636	decrease	[Ca2+]i
EGFR	activates	[Ca2+]i
IP3	increases	[Ca2+]i
IP3	increases	[Ca2+]i
PKA	activates	[Ca2+]i
PKC	activates	[Ca2+]i
ROS	increases	[Ca2+]i
actin dynamics	activates	ACTA1
Arp2/3	polymerize	ACTA1
CDC42	0.952	ACTA1
CFL1	0.991	ACTA1
cofilin I	polymerize	ACTA1
cofilin II	polymerize	ACTA1
CTNND1	0.422	ACTA1
PA	severs	ACTA1
SRC	0.954	ACTA1
WAS	0.984	ACTA1
[Ca2+]i	activates	actin dynamics
ACTA1	activates	actin dynamics
ACTA1	activates	actin dynamics
actin dynamics	activates	actin dynamics
actin dynamics	induces	actin dynamics
ADF/cofilin	produce	actin dynamics
Arp2/3	activates	actin dynamics
capping protein β3	binds	actin dynamics
CDC42	regulates	actin dynamics
destrin	stimulates	actin dynamics
EGF	stimulates	actin dynamics
Gelsolin-PIP2	activates	actin dynamics
H2O2	stimulates	actin dynamics
latrunculins	inhibit	actin dynamics
PA	activates	actin dynamics
PI3K	activates	actin dynamics
PIP3	regulated	actin dynamics
PKA	actives	actin dynamics
PKC	involved	actin dynamics
PLCγ	releases	actin dynamics
PLD	activates	actin dynamics
protein phosphatase 1δ activity	produce	actin dynamics
p-Tyr	stimulates	actin dynamics
RhoA	regulates	actin dynamics
ROS	inhibites	actin dynamics
scinderin	binds	actin dynamics
testis-specific actin capping protein	binds	actin dynamics
thymosin β10	stimulates	actin dynamics
tyrosine phosphatase	inhibitis	actin dynamics
destrin	membro	ADF/cofilin
LIMK	phosphorylate	ADF/cofilin
phosphatase slingshot	dephosphorylates	ADF/cofilin
RhoA	phosphorylate	ADF/cofilin
testicular protein kinase	phosphorylate	ADF/cofilin
AKAP4	0.453	AKAP3
BRAP	0.630	AKAP3
BRAP2	binds	AKAP3
CABYR	0.894	AKAP3
GNA13	binds	AKAP3
Kinases	phosphorylates	AKAP3
PI3K	blocks	AKAP3
PKA	actives	AKAP3
ROPN1L	0.946	AKAP3
CABYR	0.736	AKAP4
Kinases	phosphorylates	AKAP4
proAKAP4	forms	AKAP4
ROPN1L	0.580	AKAP4
ANAPC10	0.999	ANAPC1
BUB3	0.996	ANAPC1
CDC16	0.999	ANAPC1
CDC20	0.999	ANAPC1
CDC23	0.999	ANAPC1
CDK1	0.957	ANAPC1
NEK2	0.944	ANAPC1
PTTG1	0.927	ANAPC1
actin dynamics	activates	AR
PLCγ	involved	AR
Brefeldin	inhibition	ARF
PIP3	recruiting	ARF
PKA	phosphorylates	ARF
CDC42	0.974	ARHGAP10
PTK2B	0.705	ARHGAP10
CK-636	inhibitis	Arp2/3
JMY	actives	Arp2/3
Scar/WAVE	actives	Arp2/3
WASH	actives	Arp2/3
Wasp	interacts	Arp2/3
WASP family	actives	Arp2/3
WHAMM	actives	Arp2/3
ANAPC1	0.892	BUB1
ANAPC10	0.822	BUB1
BUB3	0.999	BUB1
CDC16	0.888	BUB1
CDC20	0.999	BUB1
CDC23	0.905	BUB1
CDC42	0.919	BUB1
CDK1	0.999	BUB1
CKS1B	0.745	BUB1
NEK2	0.975	BUB1
PRC1	0.963	BUB1
PTTG1	0.957	BUB1
ANAPC1	0.999	BUB1B
ANAPC10	0.999	BUB1B
BUB1	0.999	BUB1B
BUB3	0.999	BUB1B
CCNB2	0.997	BUB1B
CDC16	0.999	BUB1B
CDC20	0.999	BUB1B
CDC23	0.999	BUB1B
CDC42	0.916	BUB1B
CDK1	0.999	BUB1B
CKS1B	0.627	BUB1B
MAD2L1	0.999	BUB1B
NEK2	0.999	BUB1B
PLK1	0.998	BUB1B
PRC1	0.962	BUB1B
PTTG1	0.975	BUB1B
ANAPC10	0.976	BUB3
CDC20	0.999	BUB3
CDC23	0.998	BUB3
CDC42	0.921	BUB3
CDK1	0.997	BUB3
PRC1	0.557	BUB3
PTTG1	0.786	BUB3
IP3	activates	Ca2+ channel opening
AKAP3	binds	CABYR
AKAP3	bind	CALM
PP2A	activates	CAMKII
PP2A	activates	CAMKII
SRC	activates	CAMKII
Calcitonin	increases	cAMP
CGS 21680	increases	cAMP
FPP	increases	cAMP
MMPX	increases	cAMP
P4	increases	cAMP
PDE	degradates	cAMP
PDE 1	hydrolyzes	cAMP
PDE 4	hydrolyzes	cAMP
proAKAP4	inhibits	cAMP
sAC	activates	cAMP
sAC	synthetizes	cAMP
sAC	generates	cAMP
tmAC	activates	cAMP
AKAP3	bind	CaN
H2O2	inhibits	capacitation
PKA	modulates	CatSper
CDC42	0.571	CAV1
SRC	phosphorylates	CAV1
SRC	phosphorylates	CAV1
SRC	inhibits	CAV1
SRC	0.992	CAV1
ANAPC1	0.937	CCNA2
ANAPC10	0.956	CCNA2
BUB1	0.990	CCNA2
BUB1B	0.999	CCNA2
BUB3	0.962	CCNA2
CCNB2	0.977	CCNA2
CDC16	0.954	CCNA2
CDC20	0.999	CCNA2
CDC23	0.955	CCNA2
CDK1	0.999	CCNA2
CKS1B	0.998	CCNA2
MAD2L1	0.999	CCNA2
NEK2	0.965	CCNA2
PLK1	0.994	CCNA2
PRC1	0.954	CCNA2
PTTG1	0.961	CCNA2
SRC	0.619	CCNA2
ANAPC1	0.945	CCNB1
ANAPC10	0.999	CCNB1
BUB1	0.997	CCNB1
BUB1B	0.998	CCNB1
BUB3	0.982	CCNB1
CCNA2	0.998	CCNB1
CCNB2	0.999	CCNB1
CCNE1	0.953	CCNB1
CDC16	0.977	CCNB1
CDC20	0.999	CCNB1
CDC23	0.975	CCNB1
CDC42	0.494	CCNB1
CDK1	0.999	CCNB1
CDK2	0.999	CCNB1
CKS1B	0.996	CCNB1
MAD2L1	0.998	CCNB1
NEK2	0.955	CCNB1
PLK1	0.999	CCNB1
PRC1	0.977	CCNB1
PTTG1	0.983	CCNB1
SRC	0.401	CCNB1
ANAPC1	0.780	CCNB2
ANAPC10	0.848	CCNB2
BUB1	0.999	CCNB2
BUB3	0.969	CCNB2
CDC16	0.850	CCNB2
CDC20	0.999	CCNB2
CDC23	0.871	CCNB2
CDK1	0.999	CCNB2
CKS1B	0.994	CCNB2
MAD2L1	0.998	CCNB2
NEK2	0.979	CCNB2
PLK1	0.998	CCNB2
PRC1	0.959	CCNB2
PTTG1	0.974	CCNB2
ANAPC1	0.703	CCNE1
ANAPC10	0.714	CCNE1
BUB1	0.634	CCNE1
BUB1B	0.535	CCNE1
BUB3	0.403	CCNE1
CCNA2	0.960	CCNE1
CCNB2	0.540	CCNE1
CDC16	0.751	CCNE1
CDC20	0.730	CCNE1
CDC23	0.764	CCNE1
CDK1	0.994	CCNE1
CDK2	0.999	CCNE1
CKS1B	0.991	CCNE1
MAD2L1	0.579	CCNE1
PLK1	0.697	CCNE1
PRC1	0.547	CCNE1
PTTG1	0.498	CCNE1
ANAPC10	0.999	CDC16
BUB3	0.998	CDC16
CDC20	0.999	CDC16
CDC23	0.999	CDC16
CDK1	0.968	CDC16
NEK2	0.994	CDC16
PRC1	0.522	CDC16
PTTG1	0.940	CDC16
ANAPC10	0.999	CDC20
CDC23	0.999	CDC20
CDC42	0.919	CDC20
CDK1	0.999	CDC20
PRC1	0.985	CDC20
PTTG1	0.999	CDC20
ANAPC10	0.999	CDC23
CDK1	0.967	CDC23
PTK2	actives	CDC25
CAV1	regolates	CDC42
CAV1	inhibits	CDC42
CFL1	0.773	CDC42
LIMK	activates	CDC42
secramine A	inhibits	CDC42
p27	inhibits	CDK/cyclins
ANAPC10	0.963	CDK1
CDC42	0.523	CDK1
PP2-B55	dephosphorylates	Cdk1
ANAPC1	0.950	CDK2
ANAPC10	0.948	CDK2
BUB1	0.810	CDK2
BUB1B	0.779	CDK2
BUB3	0.573	CDK2
CCNA2	0.999	CDK2
CCNB2	0.999	CDK2
CDC16	0.950	CDK2
CDC20	0.981	CDK2
CDC23	0.953	CDK2
CDC42	0.433	CDK2
CDK1	0.994	CDK2
CKS1B	0.999	CDK2
MAD2L1	0.775	CDK2
PDK1	0.546	CDK2
PLK1	0.603	CDK2
PRC1	0.686	CDK2
PTTG1	0.721	CDK2
ANAPC1	0.911	CDKN1B
ANAPC10	0.904	CDKN1B
CCNA2	0.999	CDKN1B
CCNB1	0.998	CDKN1B
CCNB2	0.929	CDKN1B
CCNE1	0.999	CDKN1B
CDC16	0.910	CDKN1B
CDC23	0.906	CDKN1B
CDK1	0.964	CDKN1B
CDK2	0.999	CDKN1B
CKS1B	0.990	CDKN1B
PLK1	0.408	CDKN1B
PRC1	0.904	CDKN1B
SRC	0.766	CDKN1B
PDE 1	hydrolyzes	cGMP
PDE 4	hydrolyzes	cGMP
PC	produce	choline
ANAPC1	0.430	CKS1B
ANAPC10	0.541	CKS1B
CDC16	0.687	CKS1B
CDC20	0.993	CKS1B
CDC23	0.707	CKS1B
CDK1	0.999	CKS1B
NEK2	0.668	CKS1B
PRC1	0.755	CKS1B
PTTG1	0.863	CKS1B
cAMP	actives	cNGCC
LIMK	phosphorylates	Cofilin
SSH1L	dephosphorylates	cofilin
Wasp	interacts	Cofilin I
Wasp	interacts	Cofilin II
BRAP	0.450	CTNND1
CDC42	0.970	CTNND1
PIP2 cleavage	form	DAG
PKA	activates	Dynein (motility)
[Ca2+]i	activates	EGFR
EGF	activates	EGFR
EGF	actives	EGFR
SRC	activates	EGFR
SRC	phosphorylate	EGFR
CAV1	interacts	eNOS
cAMP	actives	Epac
ROS	phospharylates	ERK
PMA	activates	ERK1/2
CAV1	interacts	G protein
[Ca2+]i	activates	Gelsolin
PIP2	binds	Gelsolin
SRC	phosphorylate	Gelsolin
SRC	inactivates	Gelsolin
tyrosine dephosphorylation	activates	Gelsolin
Gelsolin	form	Gelsolin-PIP2
PIP2 cleavage	form	Gelsolin-PIP2
LPA	activates	GNA13
ROS	produce	H2O2
Na+/HCO3-	trasport	HCO3-
PIP2	produces	IP2
PIP2	produces	IP3
PIP2 cleavage	form	IP3
PAK	stimulates	LIMK
PKA	phosphorylates	LIMK
ROCK	phosphorylates	LIMK
ACTA1	0.919	LIMK1
CDC42	0.976	LIMK1
CFL1	0.997	LIMK1
WAS	0.562	LIMK1
LPA	form	LPAR-LPA
LPAR	form	LPAR-LPA
ANAPC1	0.999	MAD2L1
ANAPC10	0.998	MAD2L1
BUB1	0.999	MAD2L1
BUB3	0.999	MAD2L1
CDC16	0.999	MAD2L1
CDC20	0.999	MAD2L1
CDC23	0.999	MAD2L1
CDC42	0.905	MAD2L1
CDK1	0.999	MAD2L1
CKS1B	0.982	MAD2L1
NEK2	0.999	MAD2L1
PLK1	0.998	MAD2L1
PRC1	0.962	MAD2L1
PTTG1	0.936	MAD2L1
PKA	phosphorylates	MAPK
C3 exoenzyme	0.931	MAPK1
CAV1	0.661	MAPK1
CCNA2	0.558	MAPK1
CCNB1	0.597	MAPK1
CDC42	0.841	MAPK1
CDK2	0.933	MAPK1
CDKN1B	0.479	MAPK1
CFL1	0.639	MAPK1
NEK2	0.607	MAPK1
PAK1	0.640	MAPK1
PRRT2	0.910	MAPK1
PTTG1	0.459	MAPK1
RAF1	0.964	MAPK1
SRC	0.963	MAPK1
sperm plasma membrane	present	Na+/HCO3-
ANAPC10	0.946	NEK2
BUB3	0.947	NEK2
CDC20	0.999	NEK2
CDC23	0.972	NEK2
CDK1	0.993	NEK2
PRC1	0.867	NEK2
PTTG1	0.886	NEK2
insulin	increase	NO
ROS	produce	NO
TNFα	increase	NO
PC	produce	PA
RHO	activates	PAK
ACTA1	0.953	PAK1
CAV1	0.480	PAK1
CDC42	0.999	PAK1
CFL1	0.567	PAK1
CTNND1	0.920	PAK1
LIMK1	0.960	PAK1
PLK1	0.949	PAK1
RHO	0.577	PAK1
SRC	0.940	PAK1
WAS	0.587	PAK1
PLD	hydrolyses	PC
CGS 21680	reduces	PDE
MAPK1	phosphorylates	PDE
PKA	phosphorylates	PDE
PKA	activates	PDE
calmodulin	activates	PDE 1
MMPX	inhibites	PDE 1
AKAP3	bind	PDE4
HCO3-	increase	pHi
PI4K	phosphorylate	PI phosphorilate
EGFR	activates	PI3K
Py2k	phosphorylates	PI3K
Pyk2	phosphorylates	PI3K
PKA	activates	PI3K
PP1γ2	inhibition	PI3K
ROS	phosphorylates	PI3K/Akt
Spermine	activates	PI4K
PI phosphorilate	form	PI4P
PI4P5K	phosphorylate	PI4P
PLCγ	catalyzes	PIP2
PLCγ	hydrolyzes	PIP2
PI3K	phosphorylates	PIP2 cleavage
PI4P	form	PIP2 cleavage
PLCγ	hydrolyses	PIP2 cleavage
PDK1	binds	PIP3
PI3K	production	PIP3
PIP2	produces	PIP3
PIP2	produces	PIP3
PIP2 cleavage	form	PIP3
AKAP3	bind	PKA
AKAP4	binds	PKA
Arp2/3	regulates	PKA
cAMP	activates	PKA
cAMP	binds	PKA
cAMP	activates	PKA
H2O2	actives	PKA
PDE	activates	PKA
PP2A	blocks	PKA
p-Tyr	stimulates	PKA
ROS	phosphorylates	PKA
PP2A	activates	PKA
AKAP3	bind	PKC
DAG	activates	PKC
DAG	activates	PKC
ROS	phosphorylates	PKC
PKC	isoform	PKCα
Proteasome	degrades	PKCα
[Ca2+]i	activates	PLCγ
[Ca2+]i	activates	PLCγ
actin dynamics	immobilized	PLCγ
actin dynamics	immobilized	PLCγ
EGF	activates	PLCγ
EGFR	activates	PLCγ
Galpha	stimulates	PLCγ
ARF	activates	PLD
LPAR-LPA	activates	PLD
PKA	activates	PLD
PKC	activates	PLD
PKC	activates	PLD
RhoA	regulated	PLD
TK	activates	PLD
MAPK	activates	PLD
PIP2 cleavage	activates	PLD
ANAPC1	0.939	PLK1
ANAPC10	0.937	PLK1
BUB1	0.999	PLK1
BUB3	0.983	PLK1
CDC16	0.975	PLK1
CDC20	0.999	PLK1
CDC23	0.973	PLK1
CDC42	0.945	PLK1
CDK1	0.998	PLK1
CKS1B	0.925	PLK1
NEK2	0.971	PLK1
PRC1	0.998	PLK1
PTTG1	0.990	PLK1
actin dynamics	activates	PM and OAM fusion
PKA	inhibition	PP1γ2
PKC	activates	PP1γ2
Proteasome	degrades	PP1γ2
SRC	inactivates	PP2A
SRC	inhibits	PP2A
CDC23	0.539	PRC1
CDK1	phosphorylates	PRC1
CDK1	0.988	PRC1
p27	blocks	PRC1
PP2-B55	activates	PRC1
ERK2	phosphorylates	proAKAP4
ERK2	phosphorylates	proAKAP4
PMA	moves	proAKAP4
PKA	activates	Proteasome
EGFR	actives	PTK2
CDC42	0.593	PTK2B
ANAPC10	0.948	PTTG1
CDC23	0.947	PTTG1
CDK1	0.994	PTTG1
PRC1	0.883	PTTG1
Arp2/3	regulates	p-Tyr
cAMP	stimulates	p-Tyr
EGF	stimulates	p-Tyr
Genestein	blocked	p-Tyr
H2O2	activates	p-Tyr
HCO3-	activates	p-Tyr
PDK1	inhibits	p-Tyr
sodium vanadate	stimulates	p-Tyr
TK	stimulates	p-Tyr
CAMKII	phosphorylates	Py2K
CAMKII	activates	Pyk2
LIMK	activates	RAC1
BRAP	0.949	RAF1
CDC42	0.581	RAF1
PAK1	0.958	RAF1
SRC	0.958	RAF1
proAKAP4	interacts	Raf-1
CDC42	0.494	RASIP1
ALDH7A1	0.668	RHO
C3 exoenzyme	inactivates	RHO
CDC42	0.710	RHO
GDI	inhibits	RHO
GEFs	phosphorylates	RHO
SRC	0.493	RHO
C3 exoenzyme	inhibition	Rho GTPase
CDC42	member	Rho GTPase
GEFs	regulate	Rho GTPase
LIMK	dependent	Rho GTPase
RAC1	member	Rho GTPase
RhoA	member	Rho GTPase
Rhophilin	binds	Rho GTPase
CDC25	actives	RhoA
LIMK	activates	RhoA
PKA	phosphorylates	RhoA
RhoGDI1	binds	RhoA
ezrin	interacts	RhoGDI1
RHO-GTP	phophorylates	ROCK
AKAP3	binds	ROPN1
AKAP3	binds	ROPN1
AKAP3	0.943	ROPN1
AKAP4	0.697	ROPN1
CABYR	0.907	ROPN1
AKAP3	binds	ROPN1L
CABYR	0.903	ROPN1L
mitochondria	produce	ROS
PRDXs	regulates	ROS
[Ca2+]i	activates	sAC
H2O2	activates	sAC
HCO3-	activates	sAC
HCO3-	activates	sAC
PKA	inhibites	sAC
CDC42	0.988	SRC
CDK1	0.937	SRC
CFL1	0.858	SRC
CTNND1	0.999	SRC
PKA	phosphorylates	SRC
PKA	activates	SRC
PTK2B	0.964	SRC
WAS	0.894	SRC
CDC42	0.439	SSH1
CFL1	0.993	SSH1
LIMK1	0.941	SSH1
CAMKII	inhibits	SSH1L
EGF	binds	TK
EGFR	member	TK
GPCRs	activates	tmAC
H2O2	inhibits	tyrosine phosphatase
sodium vanadate	inhibitis	tyrosine phosphatase
CDC42	activates	VAMP
CDC42	activates	VAMP
CDC42	0.574	VAPA
ACTA1	0.647	VIL1
SRC	0.472	VIL1
CDC42	0.999	WAS
CFL1	0.857	WAS
PTK2B	0.576	WAS
CDC42	activates	Wasp
RhoA	binds	Wasp
RhoB	activates	Wasp

## Sheet: Bottle Necks
Top 31 in network data source ranked by BottleNeck method
Rank	Name	Score		Hubs	Node Degree
1	PKA	81		actin dynamics	36
2	CDC42	59		CDC42	34
3	actin dynamics	57		PKA	30
4	SRC	40		SRC	28
5	p-Tyr	22		CDK1	24
6	cAMP	16		CCNB1	23
7	RhoA	14		CCNA2	22
8	PIP3	12		CDK2	22
9	LIMK	11		PLK1	22
9	Wasp	11		PRC1	21
9	Arp2/3	11		BUB1	20
12	ROS	8		BUB1B	20
12	AKAP3	8		CCNB2	20
12	PP2A	8		MAD2L1	20
12	CDK1	8		CDC16	20
16	PIP2 cleavage	7		CDC20	20
16	PLK1	7		CDC23	20
18	PLD	6		PTTG1	20
18	RAF1	6		AKAP3	19
20	CAMKII	5		ANAPC1	19
20	[Ca2+]i	5		CCNE1	19
20	PI4P	5		CKS1B	19
20	sAC	5		ANAPC10	19
20	AKAP4	5		BUB3	19
25	PIP2	4		cAMP	19
25	proAKAP4	4		NEK2	18
25	MAPK1	4		[Ca2+]i	15
25	RhoA GTPase	4		ACTA1	15
25	HCO3-	4		CDKN1B	15
30	CAV1	3		MAPK1	15
30	LPAR-LPA	3		RhoA	13

## Sheet: Controllers
Hubs & BottleNecks	Node Degree	Bottleneck Score
actin dynamics	36	82
PKA	30	88
CDC42	34	34
SRC	28	23
CCNA2	22	14
cAMP	19	13
AKAP3	19	13
CDK1	24	6
ACTA1	15	15
BUB1	20	7
[Ca2+]i	15	12
RhoA	13	12
